# Supplementary material
Source: Springer Nature journal article supplement (https://www.springermedizin.de/resource/supplementary/12913_2009_1070_MOESM2_ESM.pdf/9536262)

a.

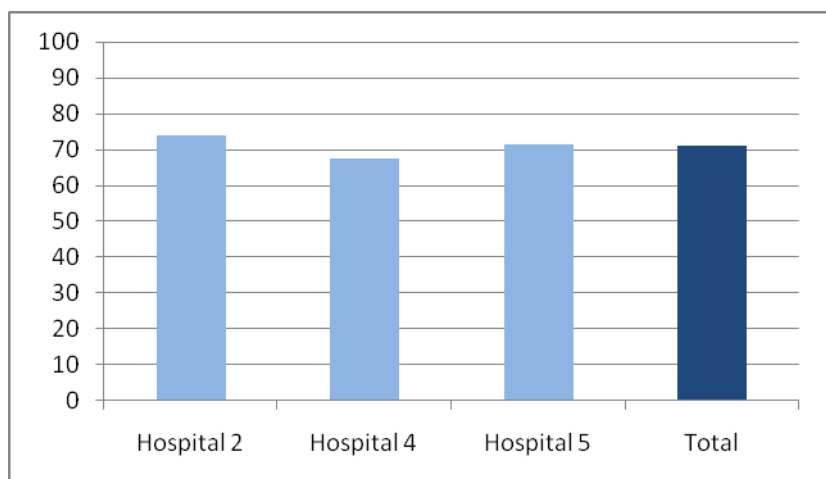

b.

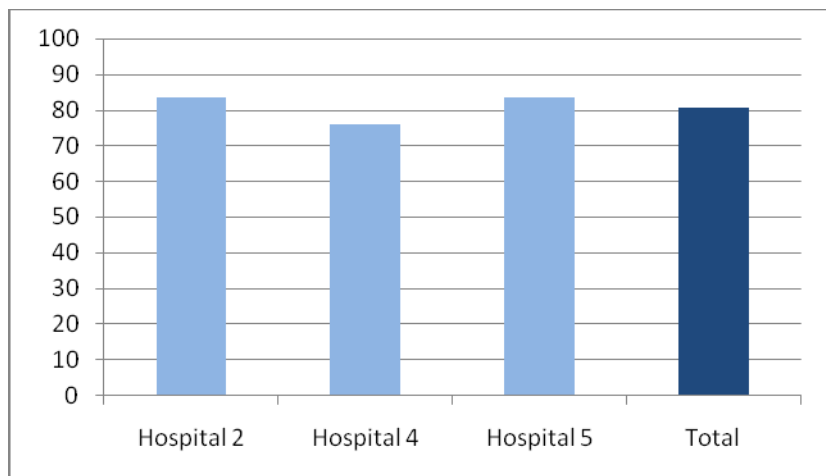

c.

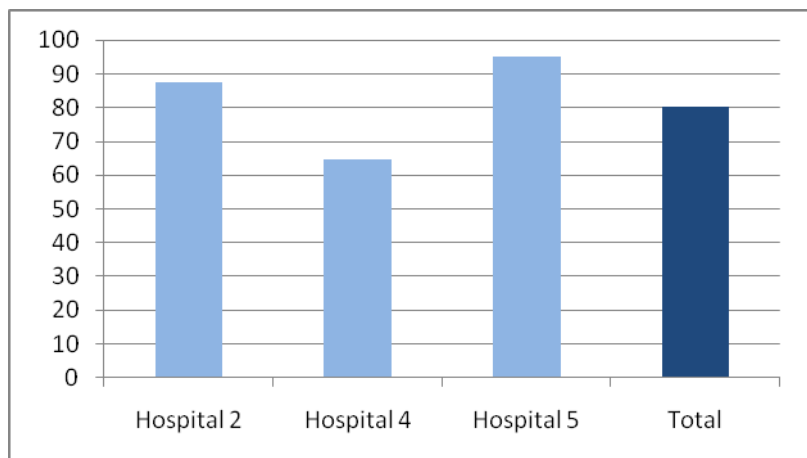

Supplement: MOESM2 [file 9536262]
